# Supplementary material for: Investment Priority Analysis of ICS Information Security Resources in Smart Mobile IoT Network Environment Using the Analytic Hierarchy Process
Source: Hindawi journal article supplement (doi:10.1155/2020/8878088), 2020-11-26
Supplement: f1 [file 8878088.f1.zip]

Archive with 3 entries (3 files):
- 8878088.f1/F01-survey sheet operation layer (1).jpg
- 8878088.f1/F02-survey sheet control layer.jpg
- 8878088.f1/F03-survey sheet field device layer.jpg
