# Supplementary figures and images for: Investment Priority Analysis of ICS Information Security Resources in Smart Mobile IoT Network Environment Using the Analytic Hierarchy Process
Source: Hindawi journal article supplement (doi:10.1155/2020/8878088), 2020-11-26

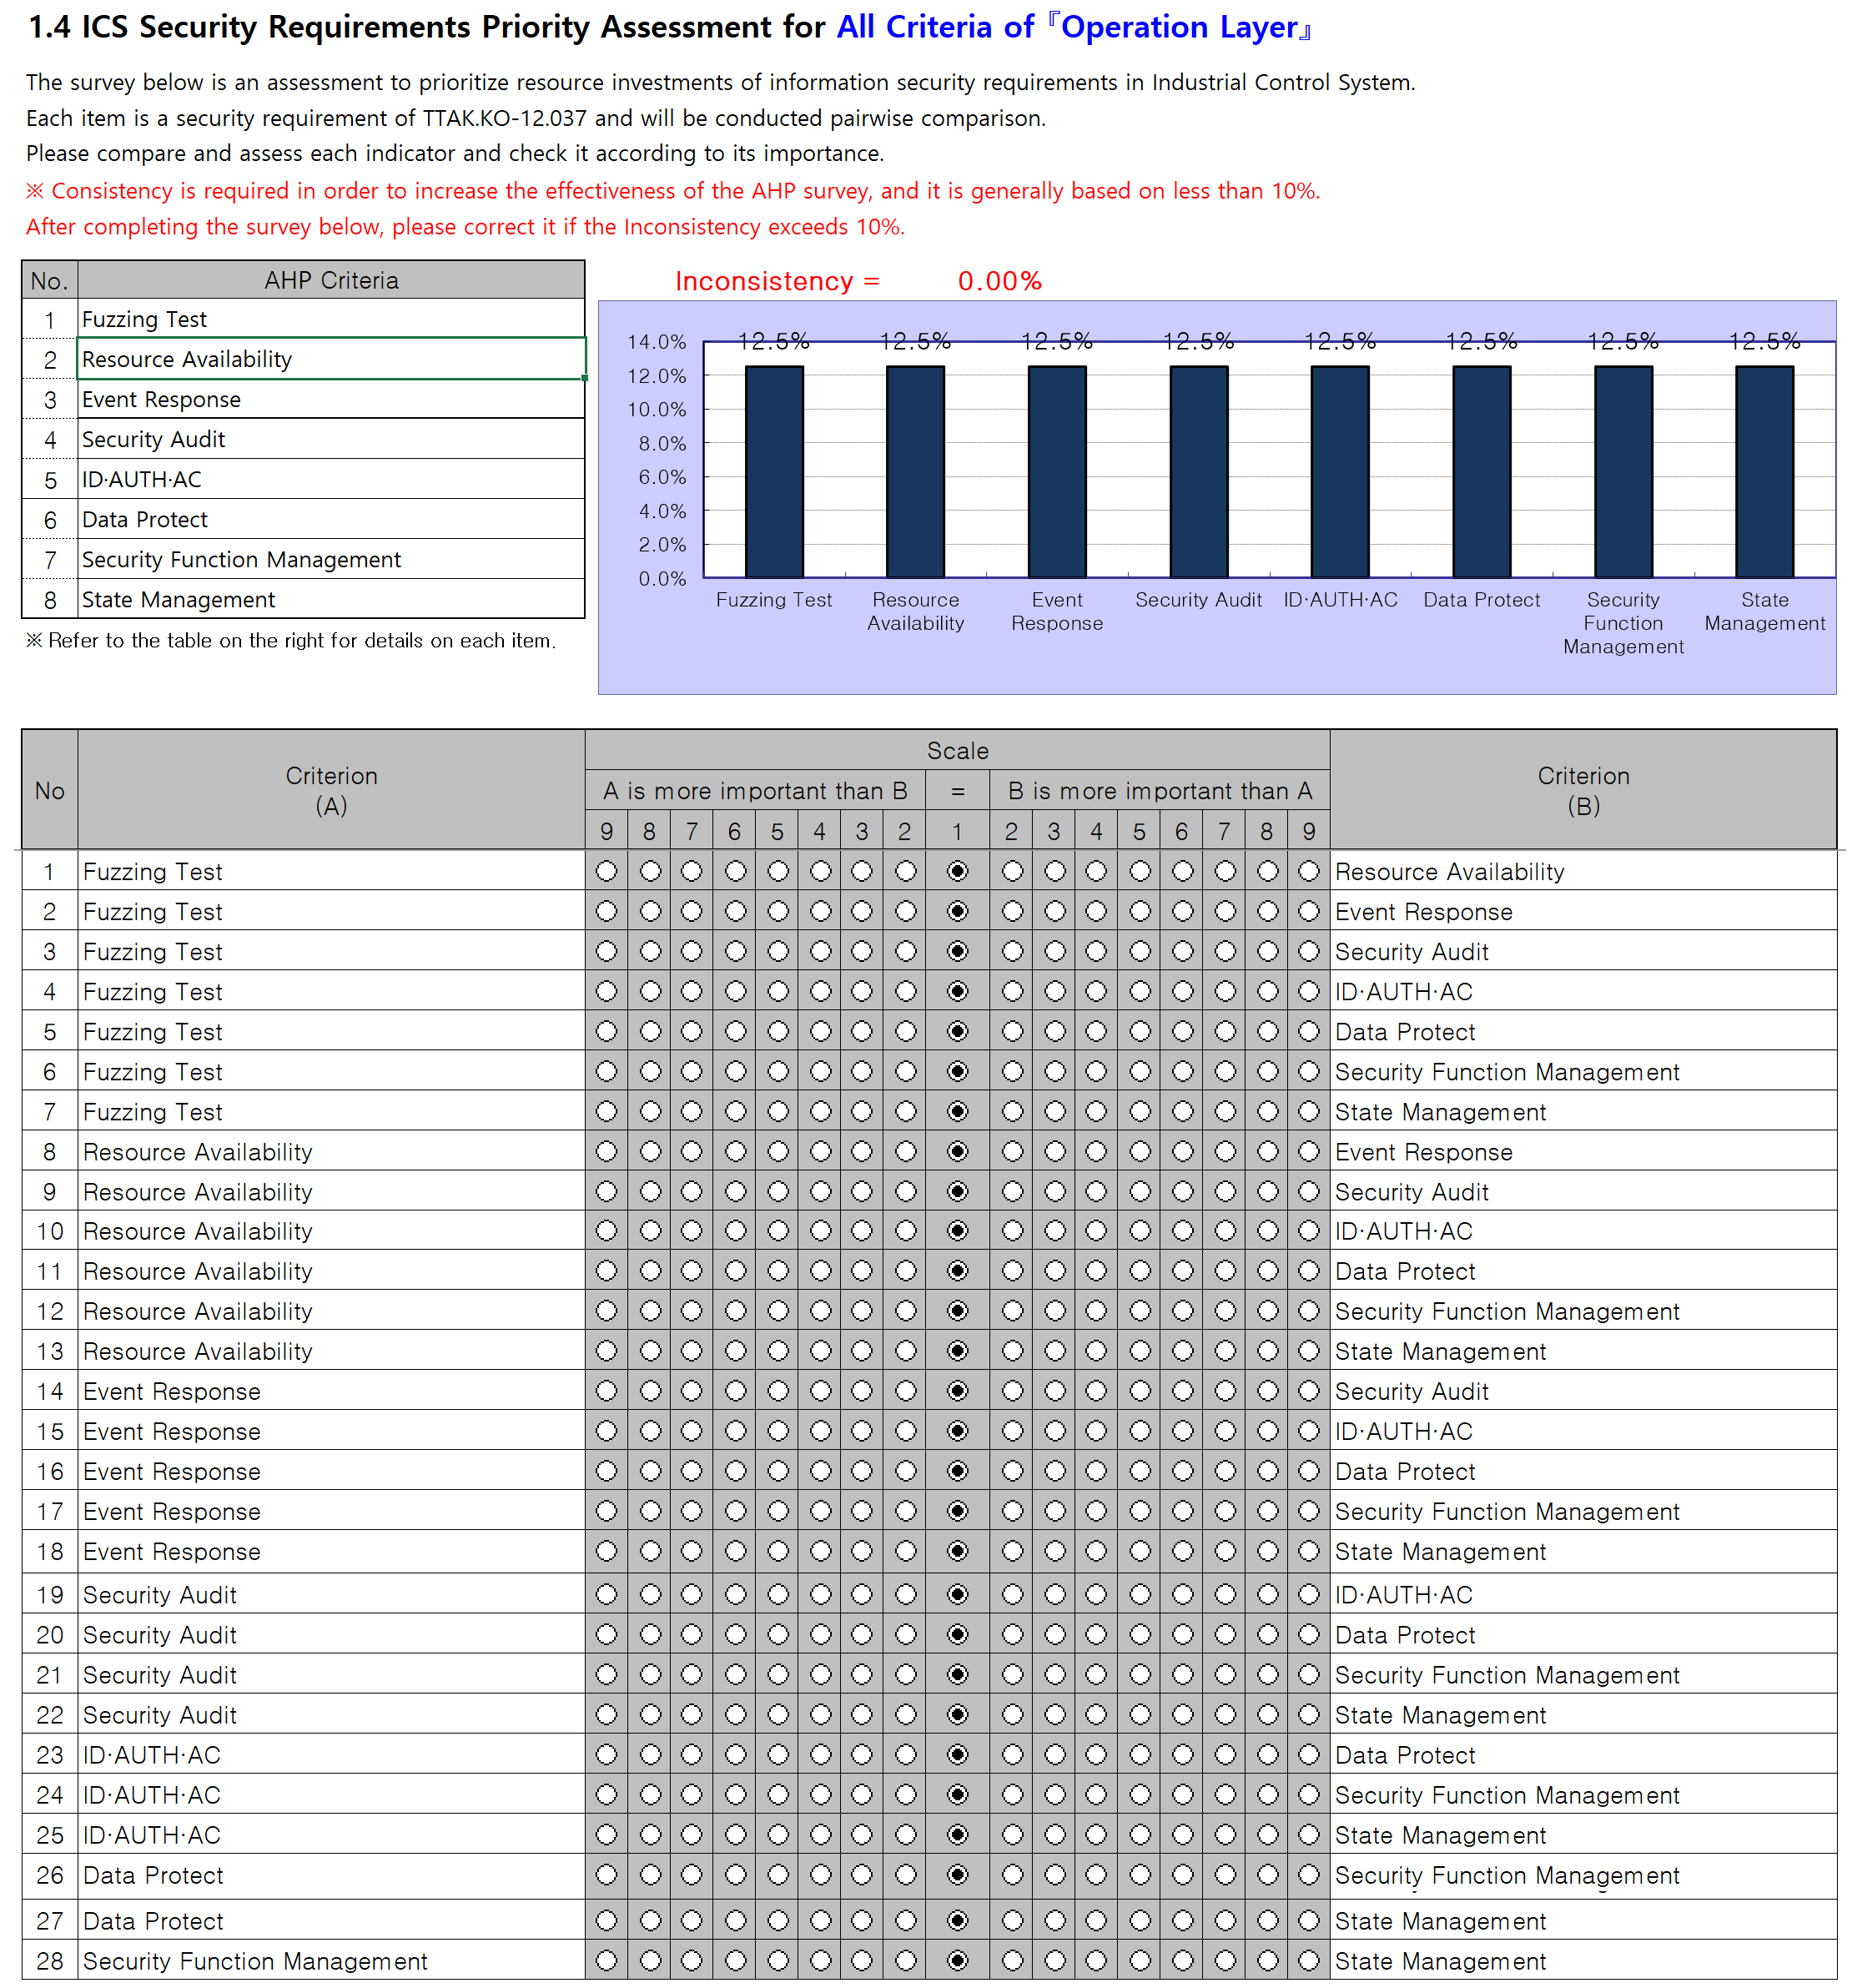

Supplement: f1 [file 8878088.f1.zip › 8878088.f1/F01-survey sheet operation layer (1).jpg]

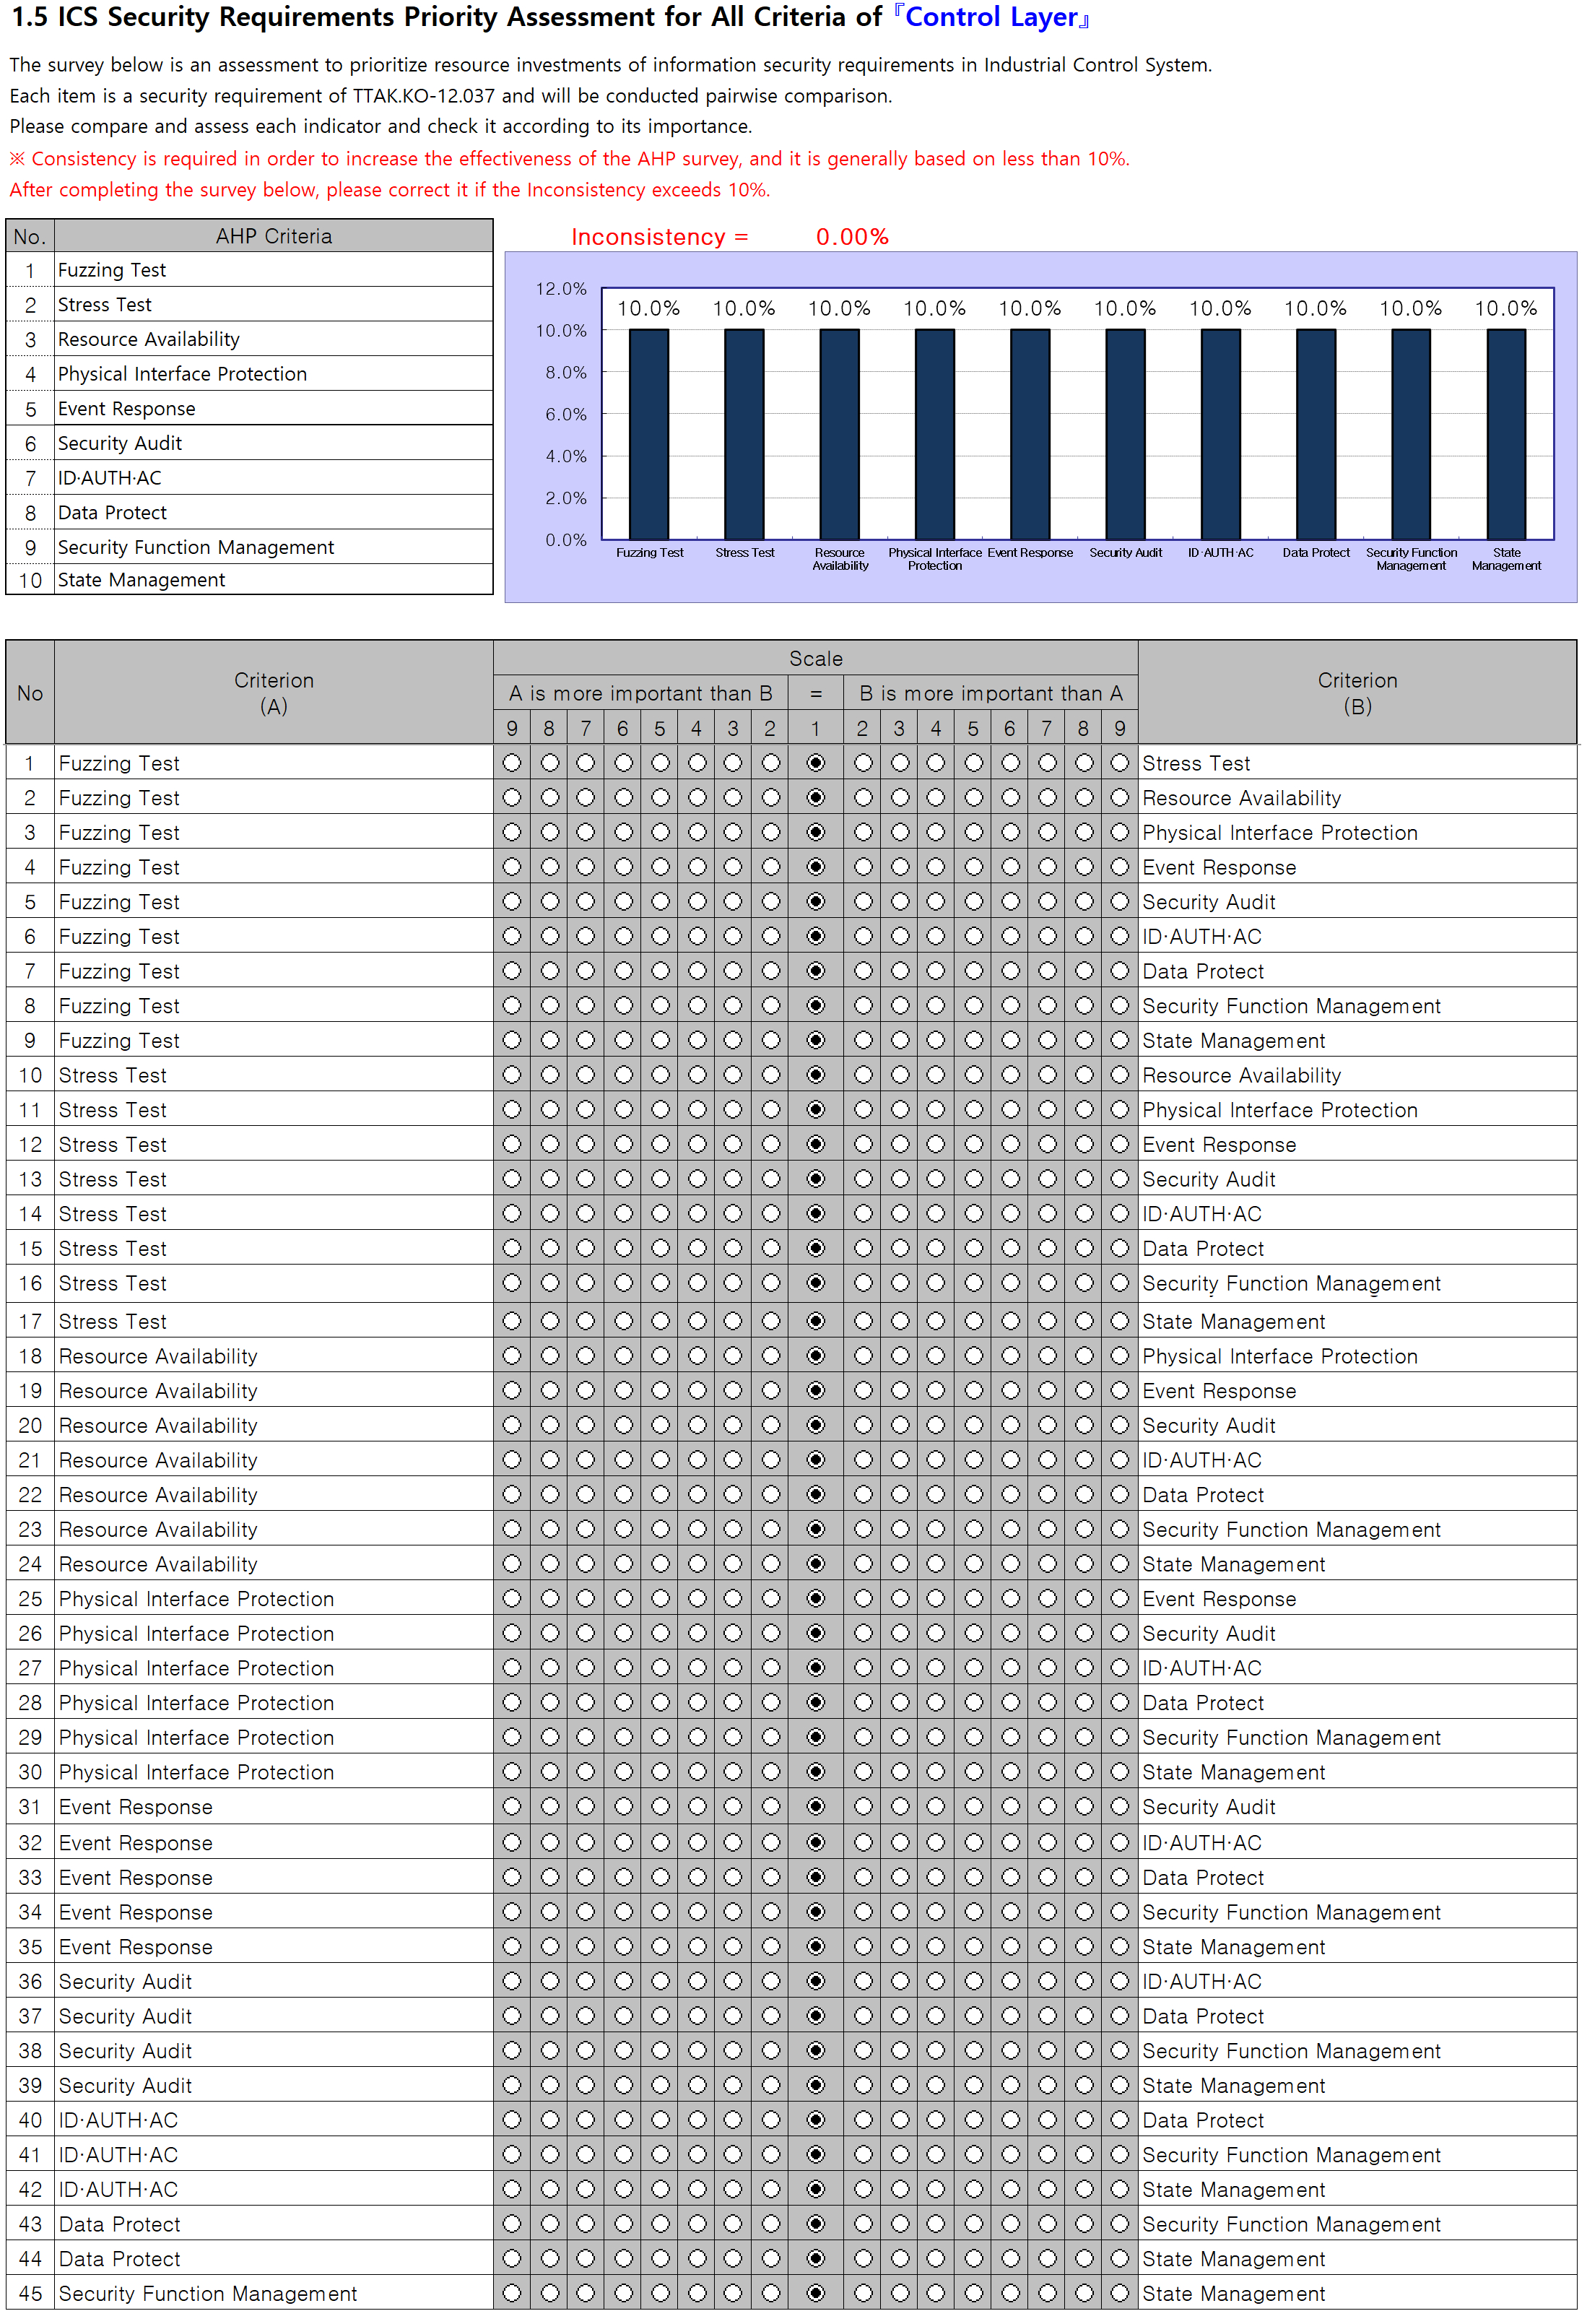

Supplement: f1 [file 8878088.f1.zip › 8878088.f1/F02-survey sheet control layer.jpg]

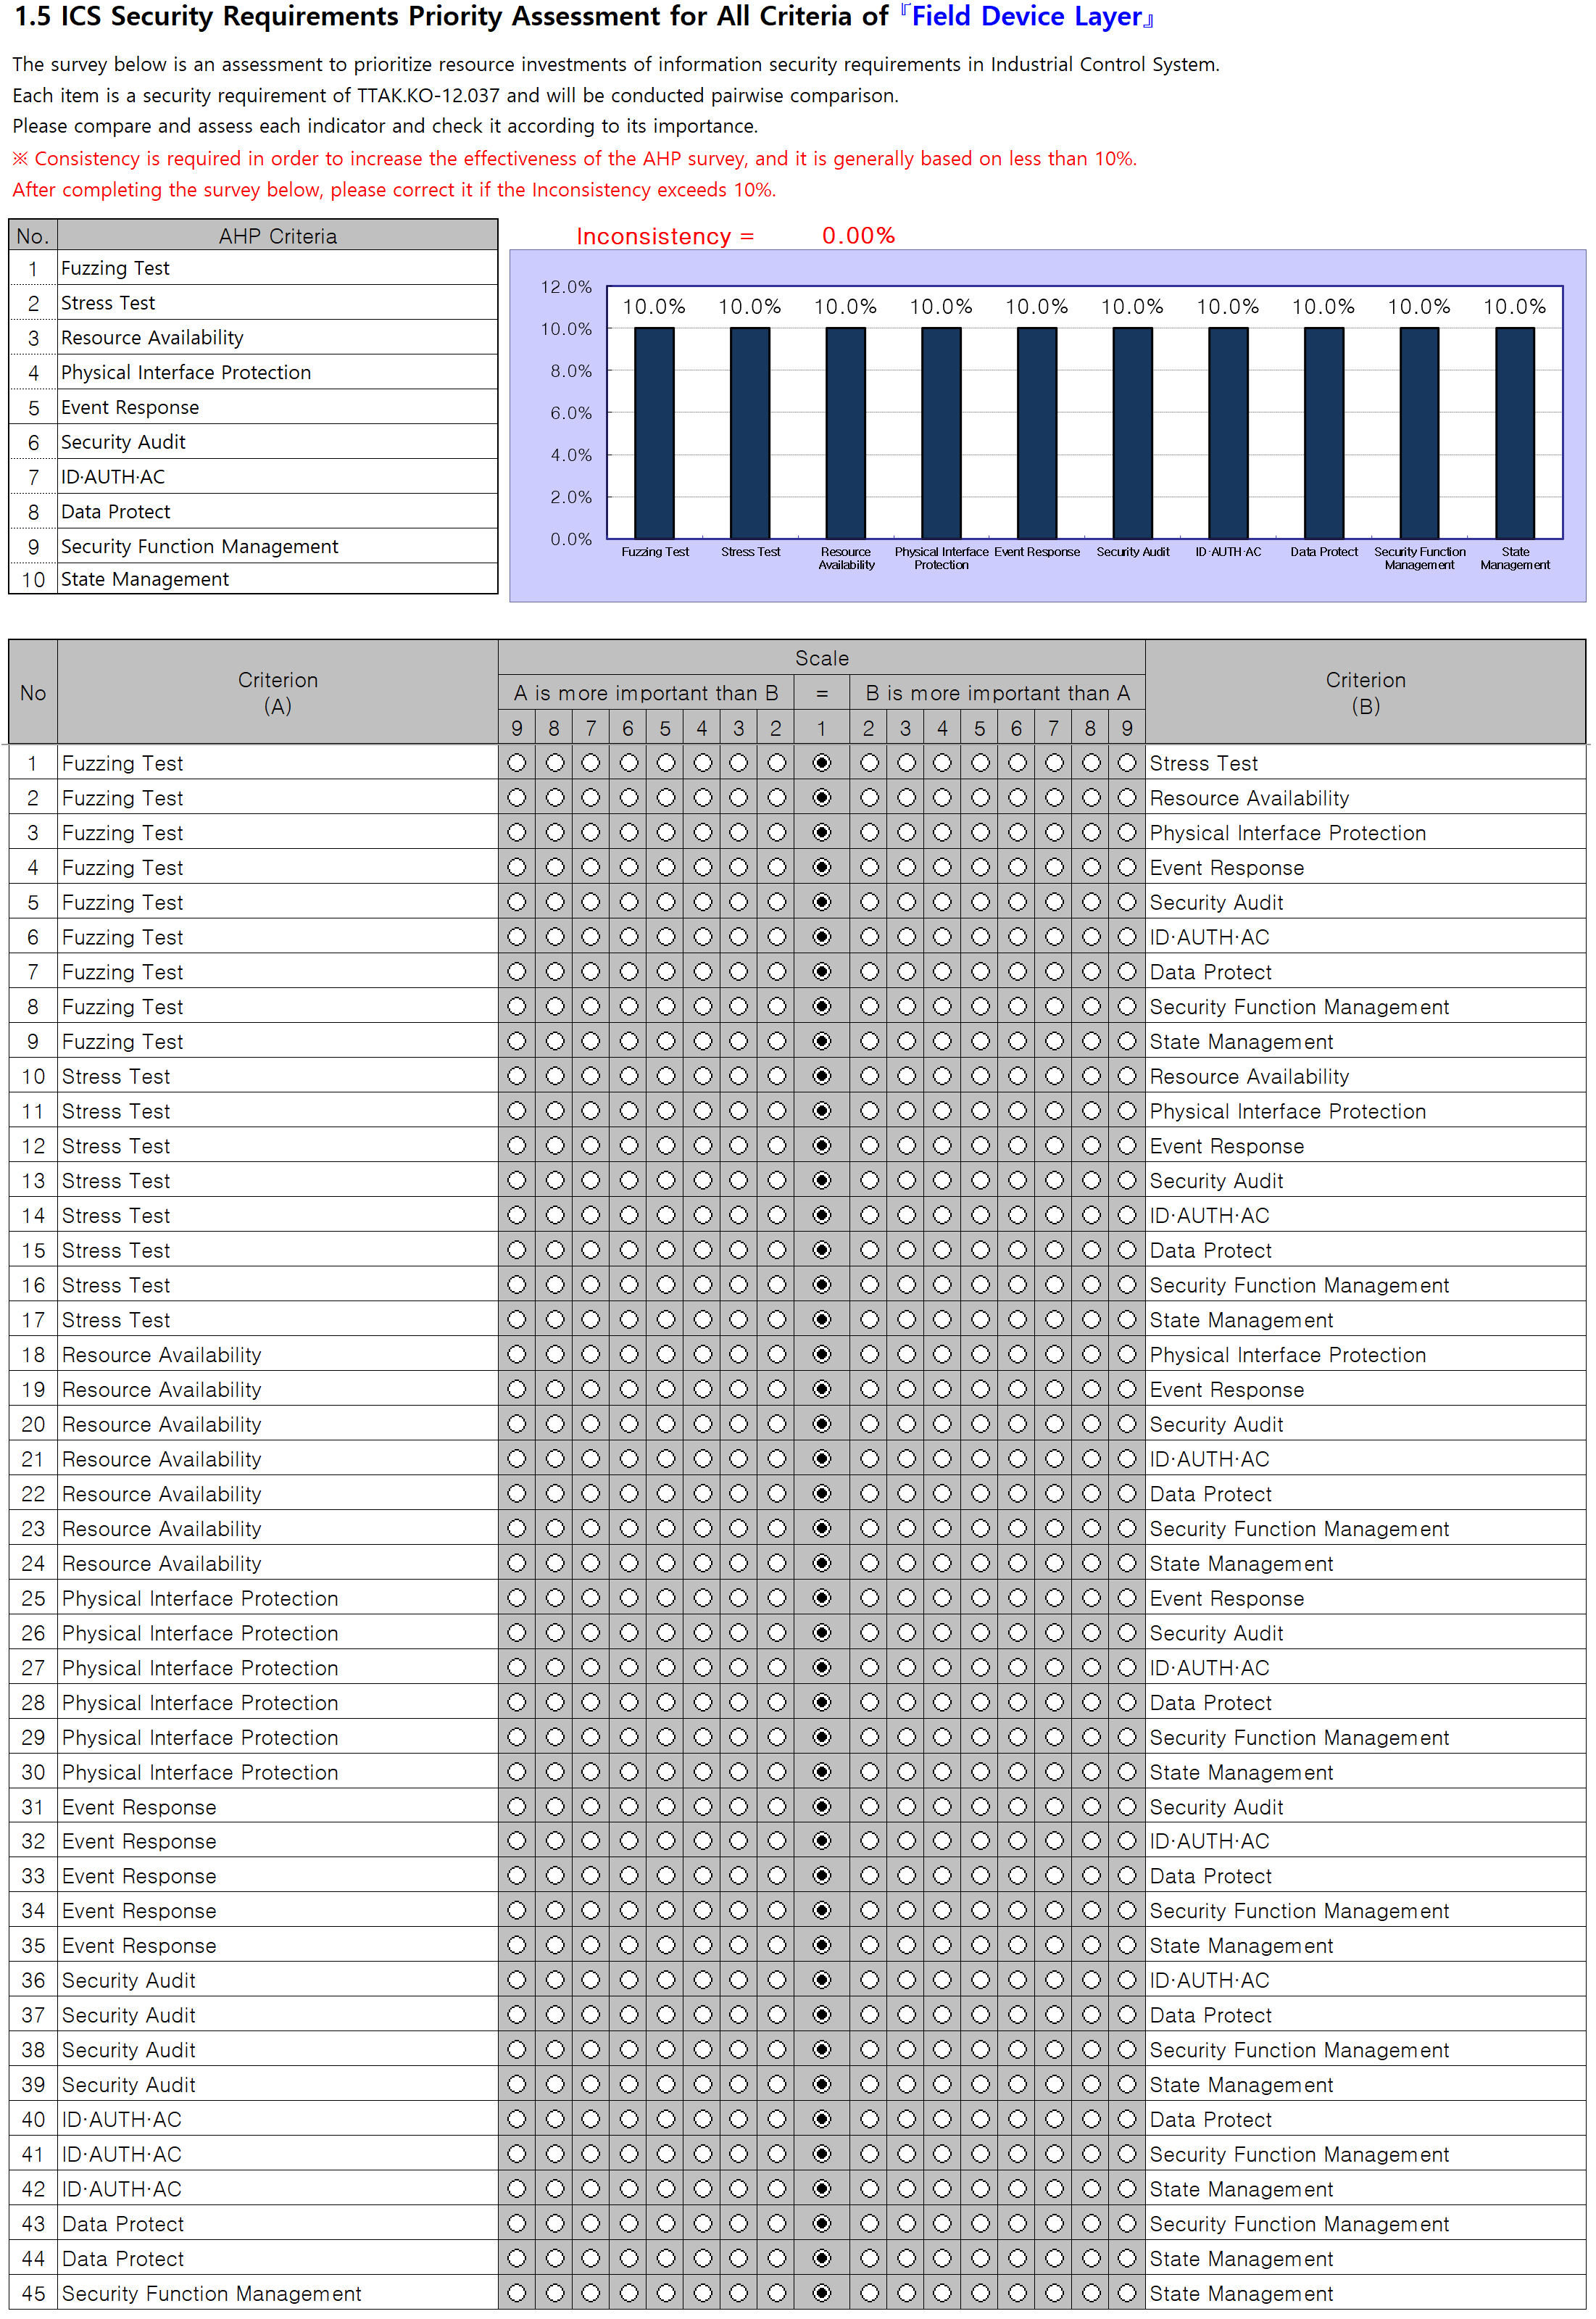

Supplement: f1 [file 8878088.f1.zip › 8878088.f1/F03-survey sheet field device layer.jpg]
